# Supplementary material
Source: PubMed Central journal article supplement (PMC4906147)
Supplement: mmc1.pdf [file mmc1.pdf]

**Biophysical Journal, Volume 110**

**Supplemental Information**

**Patch-Clamp Study of Hepatitis C p7 Channels Reveals Genotype-Specific Sensitivity to Inhibitors**

**Ulrike Breitinger, Noha S. Farag, Nourhan K.M. Ali, and Hans-Georg A. Breitinger**

**Biophysical Journal**

**Supporting Material**

**Patch-Clamp Study of Hepatitis C p7 Channels Reveals Genotype-Specific Sensitivity to Inhibitors**

Ulrike Breitinger,<sup>1</sup> Noha S. Farag,<sup>2</sup> Nourhan K. M. Ali,<sup>1</sup> and Hans-Georg A. Breitinger<sup>1,\*</sup>

<sup>1</sup>Department of Biochemistry and <sup>2</sup>Department of Microbiology and Biotechnology, German University in Cairo, New Cairo, Egypt

\*Correspondence: [hans.breitinger@guc.edu.eg](mailto:hans.breitinger@guc.edu.eg)

## Supplemental Material

Figure S1

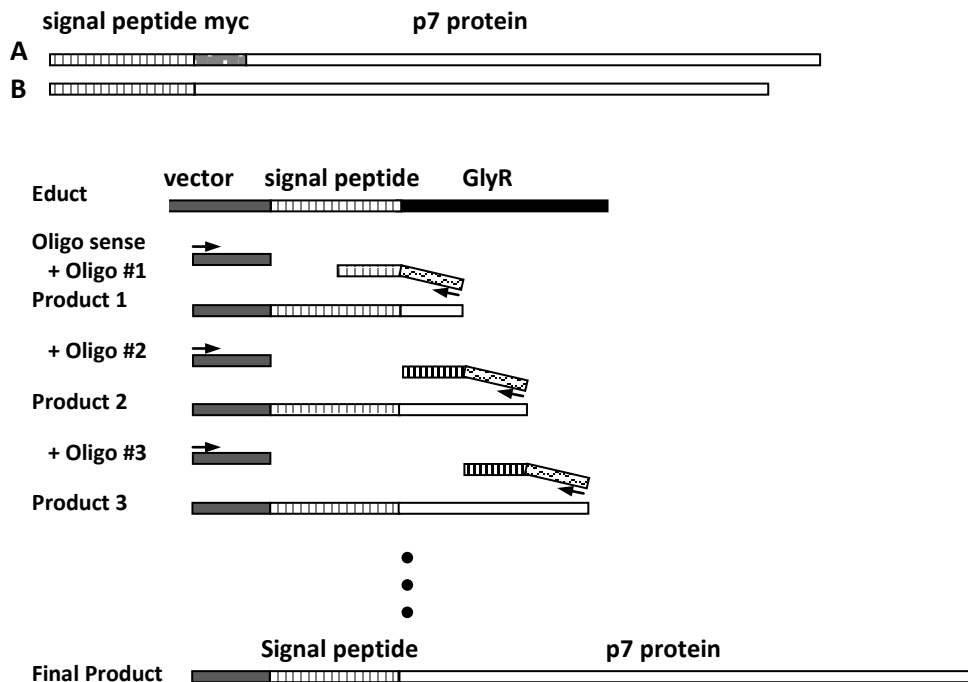

**Figure 1** Generation of p7 protein constructs.

(A) p7 constructs including a myc tag (EQKLISEEDL) for Western Blot detection. (B) p7 products, lacking the myc tag, used in electrophysiological measurements. All constructs included a membrane-directing signal peptide. Dark gray – vector; light gray – signal peptide; black – glycine receptor; white – p7; dashes – ~20 base pairs non overlapping new sequence; arrows – sense and anti sense primers.

## **Materials and Methods - supplemental information**

### *Generation of genotype-specific p7 cDNA constructs - PCR conditions*

Standard PCR reactions were set up as follows: 0.5 ng of template DNA; 50  $\mu$ M of each dATP, dCTP, dGTP, and dTTP; 0.25  $\mu$ M of each primer, and 0.5 unit of high-fidelity *Taq* polymerase were completed to the end volume with supplied buffer (Roche Molecular Biochemicals, Mannheim, Germany). PCR conditions were 2 min at 95 °C for denaturation, followed by 26 cycles of 1 min at 95 °C, 0.5 min at 55 °C, and 1.0 min at 72 °C. The last cycle ended with a 2 min 72 °C amplification.

### *Membrane Preparation and Western Blot Analysis*

HEK293 cells were harvested 3 days after transfection, taken up in PBS (1.5 mM  $\text{KH}_2\text{PO}_4$ ; 6.5 mM  $\text{Na}_2\text{HPO}_4$ ; 3.0 mM KCl; 137 mM NaCl), centrifuged (2000 x g, 10 min), and the pellet resuspended in 2 ml Buffer H (20 mM K-phosphate pH 7.4; 5 mM EDTA; 5 mM EGTA; protease inhibitors (c@plete, Roche, Mannheim, Germany)). Cells were homogenized and centrifuged for 20 min at 17000 rpm twice and the final cell pellet (membrane fraction) taken up in 0.5 ml of Buffer B (Buffer H + 200 mM KCl). Protein concentration was determined by Bradford assay. For Western blot analysis, 15  $\mu$ g of membrane fraction protein, or cell lysate were run on a 15 % SDS polyacrylamide gel (45 min, 120 V). Proteins were transferred onto nitrocellulose membrane using a semi-dry blotter (Bio-Rad, Munich, Germany). Blot membranes were blocked using bovine serum albumine. An alkaline phosphatase – conjugated anti c-myc antibody (SantaCruz, Heidelberg, Germany) was used to label myc-p7 protein and the blot visualized using 0.03 % nitro blue tetrazolium and 0.02 % 5-bromo-4-chloro-3-indolyl-phosphate in substrate buffer (100 mM Tris-HCl, pH 9.5; 100 mM NaCl; 5 mM  $\text{MgCl}_2$ ).
